# Supplementary material
Source: PubMed Central journal article supplement (PMC2766425)
Supplement: NIHMS119707-supplement-01.pdf [file NIHMS119707-supplement-01.pdf]

## Supplementary Figure 1

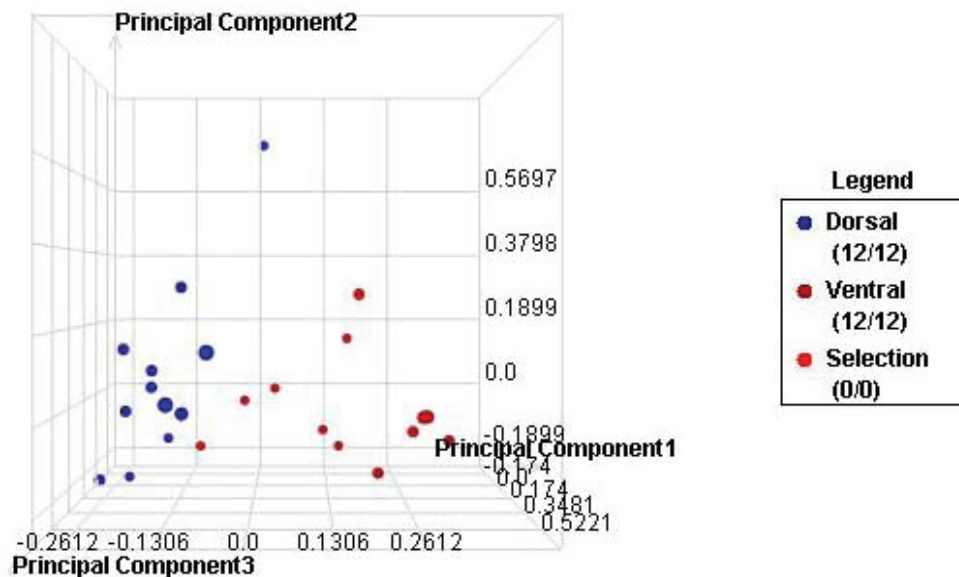

**Supplementary Figure 1: Principal Component Analysis (PCA) of complete series of microarray datasets.** This figure shows gene expression differences between dorsal and ventral telencephalic tissues are dominant when the PCA analysis is conducted across all AhR genotype and TCDD/vehicle exposed samples. PCA analysis was conducted using Rosetta Resolver (Version 7.0).
