# Supplementary material
Source: PubMed Central journal article supplement (PMC2766425)
Supplement: NIHMS119707-supplement-02.pdf [file NIHMS119707-supplement-02.pdf]

## Supplementary Figure 2

### Ventral Samples

#### Genotype

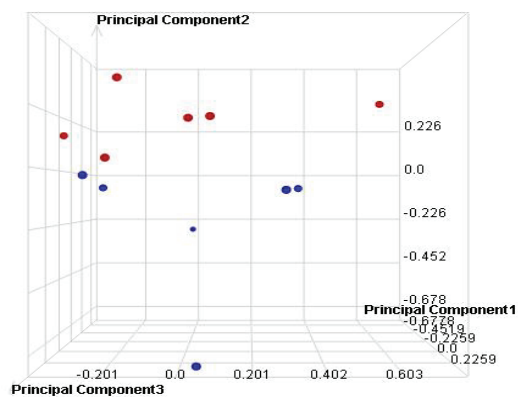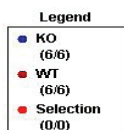

#### Treatment

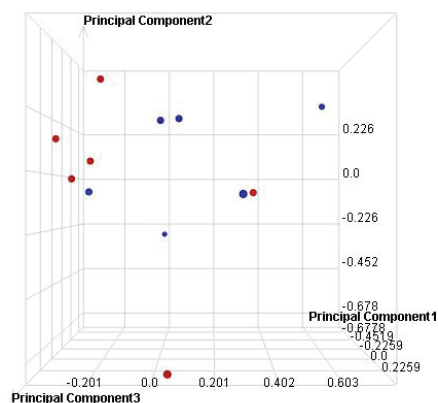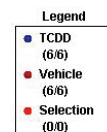

### Dorsal Samples

#### Genotype

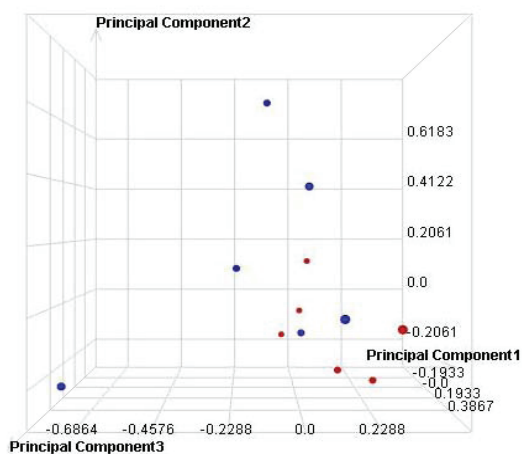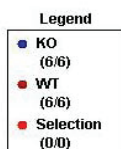

#### Treatment

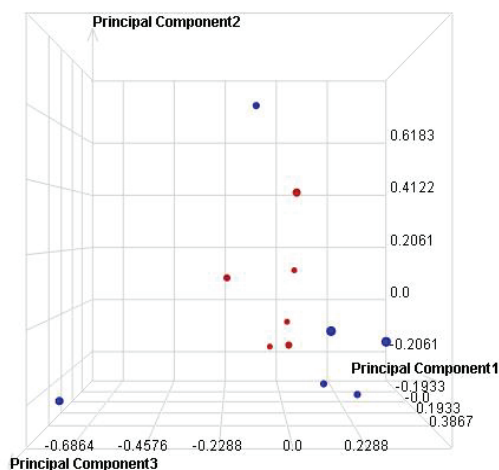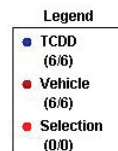

### Supplementary Figure 2: Principal Component Analysis (PCA) of ventral and dorsal microarray datasets.

This figure shows gene expression differences within ventral and dorsal telencephalic tissues by either genotype or treatment. In contrast to dorsal samples, note that in ventral samples global gene expression clusters via genotype and to some degree TCDD exposure. PCA analysis was conducted using Rosetta Resolver (Version 7.0).
